# Supplementary material for: Assessment of distinct effects of Parinari curatellifolia Planch.ex Benth Ethanolic leaf extract on glucose transport in different cell types
Source: PeerJ. 2025 Nov 10;13:e20269. doi: 10.7717/peerj.20269 (PMC12614100; doi:10.7717/peerj.20269)
Supplement: Supplemental Information 4 [file peerj-13-20269-s004.xlsx]

## Sheet: signalling GAPDH
data	GAPDH	normalised
632.02	206.348	3.06288
588.336	197.128	2.98454
545.509	199.112	2.73971
656.794	175.596	3.74037
576.463	211.286	2.72835
	247.958	0
	216.952	0
	206.95	0
	224.047	0			1	67.249	18.627
	240.072	0			2	58.72	8.841
					3	77.193	26.683
					4	67.329	15.619
					5	80.37	30.966

## Sheet: signalling
AMPKnorm/GAPDH	Pampk/gapdh	Pampk/AMPK	relative to insulin
1.09044	0.593337	0.544127	100
1.30499	0.39276	0.300968	55.3121
1.64013	0.474557	0.289342	53.1754
1.7151	0.554375	0.323232	59.4037
1.34434	0.624556	0.46458	85.3809
AMPKnorm/GAPDH	norm to 0 PCE	phospho/relative	0 PCE=1
1.09044	0.835592	0.651187	2.16364
1.30499	1	0.300968	1
1.64013	1.25681	0.230219	0.764928
1.7151	1.31426	0.245941	0.817167
1.34434	1.03016	0.45098	1.49843
Aktnorm/GAPDH	pAkt/GAPDH	pAkt/Akt	relative to insulin
2.51785	0.593337	0.235653	1
2.5836	0.39276	0.15202	0.645104
2.37309	0.474557	0.199975	0.848599
3.61248	0.554375	0.153461	0.651216
1.88858	0.624556	0.330701	1.40334
Aktnorm/GAPDH	norm to 0 PCE	phospho/relative to norm	norm		phospho/GAPDH
2.51785	1.55972	0.380412	0.968561		0.593337
2.5836	1	0.39276	1		0.39276
2.37309	0.918519	0.516654	1.31545		0.474557
3.61248	1.39824	0.396481	1.00948		0.554375
1.88858	0.730988	0.8544	2.17537		0.624556
p38norm/GAPDH	pp38/GAPDH	Pp38/p38	relative to insulin
2.28893	0.325901	0.142381	100
2.65845	0.297878	0.112049	78.6966
2.55414	0.387686	0.151788	106.606
3.09906	0.383431	0.123725	86.897
2.4602	0.380385	0.154615	108.592
p38norm/GAPDH	norm to PCE	phospho/relative to norm	norm to 0
2.28893	0.861001	0.378514	0.786966
2.65845	1	0.297878	1
2.55414	0.960761	0.40352	1.35465
3.09906	1.16574	0.328917	1.1042
2.4602	0.925427	0.411037	1.37989
pAkt raw	norm Akt raw
2678.44	632.02
2188.81	588.336
1458.13	545.509
1472.1	656.794
3012.3	576.463
pAkt/GAPDH	Akt/GAPDH	pAkt/Akt	relative to insulin
12.9802	3.06288	4.23791	100
11.1035	2.98454	3.72033	87.7871
7.32317	2.73971	2.67297	71.8477
8.38343	3.74037	2.24134	83.8518
14.257	2.72835	5.22549	233.142

## Sheet: AMPK
raw data			normalised
1	2	3	1	2	3	p-values
57.025	140.059	49.89	1	1	1
60.015	150.37	49.005	1.05243	1.07362	0.982261
51.233	211.851	50.31	0.898431	1.51258	1.00842
59.885	220.354	49.85	1.05015	1.57329	0.999198
82.316	248.707	58.34	1	1	1
85.045	314.589	61.435	1.03315	1.2649	1.05305
126.922	284.857	56.517	1.54189	1.14535	0.968752
82.295	332.646	56.077	0.999745	1.3375	0.96121
			1		16.673
			2		19.173
			3		16.362
			4		23.232
			5		54.644
			6		52.937

## Sheet: normalising
AMPK	1	2	3							mean
0	57.025	140.059	49.89		0	1	1	1		1
10	60.015	150.37	49.005		10	1.05243	1.07362	0.982261		1.0361
50	51.233	211.851	50.31		50	0.85367	1.40886	1.02663		1.09639
100	59.885	220.354	49.85		100	1.16888	1.04014	0.990857		1.06662
0	82.316	248.707	58.34		0	1	1	1		1
10	85.045	314.589	61.435		10	1.03315	1.2649	1.05305		1.11703
50	126.922	284.857	56.517		50	1.54189	1.14535	0.968752		1.21866
100	82.295	332.646	56.077		100	0.999745	1.3375	0.96121		1.09949
AMPK	1	2	3	GLUT1	1	2	3		normalised
0	57.025	140.059	49.89		3144.14	1254.14	740.724		3144.14	1254.14	740.724
10	60.015	150.37	49.005		3234.19	1148.26	673.122		3121.49	1108.25	649.666
50	51.233	211.851	50.31		3085.47	1171.27	814.134		2814.22	1068.3	742.56
100	59.885	220.354	49.85		3967.73	1591.62	1077.48		3719.9	1492.2	1010.18
0	82.316	248.707	58.34		4196.36	2425.39	1004.49		4196.36	2425.39	1004.49
10	85.045	314.589	61.435		4645.38	2284.37	1061.04		4158.68	2045.03	949.875
50	126.922	284.857	56.517		6376.62	2925.43	1259.14		5232.47	2400.52	1033.22
100	82.295	332.646	56.077		6460.42	3247.67	1367.4		5875.86	2953.81	1243.68
AMPK	1	2	3		Akt	1	2	3		normalised
0	57.025	140.059	49.89			148.636	99.456	87.572		148.636	99.456	87.572
10	60.015	150.37	49.005			129.079	126.439	82.019		124.581	122.033	79.1609
50	51.233	211.851	50.31			138.01	134.164	86.105		125.877	122.369	78.5351
100	59.885	220.354	49.85			167.757	106.154	97.888		157.279	99.5235	91.7738
0	82.316	248.707	58.34			280.69	321.538	140.113		280.69	321.538	140.113
10	85.045	314.589	61.435			234.545	367.181	126.738		209.971	328.711	113.459
50	126.922	284.857	56.517			256.374	382.065	117.366		210.373	313.511	96.3071
100	82.295	332.646	56.077			249.814	312.943	114.501		227.21	284.627	104.141
caveolin	1	2	3		norm
0	46.532	41.742	64.771		46.532	41.742	64.771
10	45.974	42.685	60.125		44.372	41.1976	58.0299
50	46.117	43.58	59.033		42.0627	39.7487	53.8432
100	46.017	45.328	60.844		43.1427	42.4967	57.0436
0	50.167	51.701	58.623		50.167	51.701	58.623
10	48.766	67.062	53.643		43.6567	60.0358	48.0227
50	52.675	66.602	50.088		43.2236	54.6517	41.1008
100	53.507	57.937	50.456		48.6655	52.6946	45.8906
ir-b subunit raw				norm
1	2	3
270.087	110.116	66.314		270.087	110.116	66.314
258.192	105.807	63.444		249.195	102.12	61.2332
200.745	92.227	69.977		183.097	84.1189	63.825
305.053	115.817	79.723		285.999	108.583	74.7434
493.939	366.5	121.557		493.939	366.5	121.557
544.219	360.149	112.988		487.2	322.415	101.15
691.038	240.956	118.38		567.046	197.721	97.1392
652.382	210.953	112.197		593.352	191.865	102.045
p38 raw data		NORM/AMPK
1	2
307.399	128.021	307.399	128.021
291.446	151.19	281.29	145.922
287.918	169.362	262.606	154.473
335.075	141.555	314.146	132.713
460.713	372.519	460.713	372.519
461.761	423.575	413.381	379.196
478.542	393.027	392.678	322.507
426.047	318.657	387.497	289.824

## Sheet: Akt
raw data			normalised
1	2	3	1	2	3	p-values
148.636	99.456	87.572	1	1	1
129.079	126.439	82.019	0.868424	1.27131	0.936589
138.01	134.164	86.105	0.92851	1.34898	0.983248
167.757	106.154	97.888	1.12864	1.06735	1.1178	0.0052	**
280.69	321.538	140.113	1	1	1
234.545	367.181	126.738	0.835602	1.14195	0.904541
256.374	382.065	117.366	0.913371	1.18824	0.837652
249.814	312.943	114.501	0.89	0.973269	0.817205
normalised data			1	2	3				PCE conc	Akt expression (relative to 0 PCE)
2.60651	0.710101	1.7553	1	1	1		1		0	1
2.15078	0.840853	1.67369	0.825158	1.18413	0.953503		0.987597		10	0.987597
2.69377	0.633294	1.71149	1.03348	0.891837	0.975039		0.966785		50	0.966785
2.80132	0.481743	1.96365	1.07474	0.678415	1.1187		0.957284		100	0.957284
3.40991	1.29284	2.40166	1	1	1		1		0	1
2.75789	1.16718	2.06296	0.808788	0.902801	0.858972		0.856854		10	0.856854
2.01993	1.34125	2.07665	0.592372	1.03745	0.864671		0.831497		50	0.831497
3.03559	0.940769	2.04185	0.890227	0.727677	0.850183		0.822696		100	0.822696
FINAL						P-VALUES - not sig
148.636	99.456	87.572	1	1	1	0.82
124.581	122.033	79.1609	0.838162	1.22701	0.904417
125.877	122.369	78.5351	0.846881	1.23038	0.897268
157.279	99.5235	91.7738	1.05815	1.00068	1.04852
280.69	321.538	140.113	1	1	1
209.971	328.711	113.459	0.748054	1.02231	0.809771
210.373	313.511	96.3071	0.749485	0.953761	0.687353
227.21	284.627	104.141	0.809469	0.907867	0.743261

## Sheet: p38 kinase
raw data		normalised
1	2	1	2
307.399	128.021	1	1
291.446	151.19	0.948103	1.18098
287.918	169.362	0.936626	1.32292
335.075	141.555	1.09003	1.10572
460.713	372.519	1	1
461.761	423.575	1.00227	1.13706
478.542	393.027	1.0387	1.05505
426.047	318.657	0.924756	0.855411
NORM/AMPK		norm to 0 PCE
307.399	128.021	1	1
281.29	145.922	0.915065	1.13983
262.606	154.473	0.854283	1.20662
314.146	132.713	1.02195	1.03665
460.713	372.519	1	1
413.381	379.196	0.897264	1.01792
392.678	322.507	0.852326	0.865745
387.497	289.824	0.84108	0.778011

## Sheet: IR-B subunit
raw data			normalised
1	2	3	1	2	3
270.087	110.116	66.314	1	1	1
258.192	105.807	63.444	0.955959	0.960869	0.956721
200.745	92.227	69.977	0.743261	0.837544	1.05524
305.053	115.817	79.723	1.12946	1.05177	1.2022	0.0423
493.939	366.5	121.557	1	1	1
544.219	360.149	112.988	1.10179	0.982671	0.929506
691.038	240.956	118.38	1.39904	0.657452	0.973864
652.382	210.953	112.197	1.32077	0.575588	0.922999
norm/AMPK			norm to 0 PCE			NO SIGNIFICANT CHANGES
270.087	110.116	66.314	1	1	1
249.195	102.12	61.2332	0.922647	0.927386	0.923383
183.097	84.1189	63.825	0.677917	0.763912	0.962467
285.999	108.583	74.7434	1.05891	0.986077	1.12711
493.939	366.5	121.557	1	1	1
487.2	322.415	101.15	0.986357	0.879715	0.83212
567.046	197.721	97.1392	1.14801	0.539486	0.799125
593.352	191.865	102.045	1.20127	0.523507	0.839483
