# Supplementary material for: Assessment of distinct effects of Parinari curatellifolia Planch.ex Benth Ethanolic leaf extract on glucose transport in different cell types
Source: PeerJ. 2025 Nov 10;13:e20269. doi: 10.7717/peerj.20269 (PMC12614100; doi:10.7717/peerj.20269)
Supplement: Supplemental Information 5 [file peerj-13-20269-s005.xlsx]

## Sheet: GROWTH CURVE 1
GROWTH CURVE - 14/06
	CELL DENSITY WAS MEASURED EVERY 90 MINS
		TIME (mins)
		90
		180
		270
		360
	WT	time
	0	90	180	270	360
0	0.1	0.112	0.15	0.225	0.326
10	0.1	0.115	0.168	0.25	0.388
30	0.1	0.107	0.139	0.214	0.319
100	0.1	0.114	0.156	0.232	0.344
300	0.1	0.083	0.137	0.201	0.323
	SSP2 MUTANT
		0	90	180	270	360
	0	0.1	0.104	0.14	0.198	0.294
	10	0.1	0.178	0.189	0.257	0.371
	30	0.1	0.152	0.182	0.276	0.392
	100	0.1	0.107	0.154	0.232	0.335
	300	0.1	0.141	0.192	0.247	0.375

## Sheet: GROWTH CURVE 2
GROWTH CURVE 22/06
CELL DENSITY MEASURED EVERY 90 MINS
		WT	time
		0	90	180	270	360
	0	0.1	0.145	0.204	0.304	0.455
	10	0.1	0.155	0.21	0.306	0.472
	30	0.1	0.157	0.216	0.319	0.479
	100	0.1	0.163	0.226	0.339	0.487
	300	0.1	0.172	0.234	0.342	0.504
	SSP2 MUTANT
		0	90	180	270	360
	0	0.1	0.174	0.226	0.312	0.455
	10	0.1	0.175	0.226	0.314	0.47
	30	0.1	0.172	0.214	0.315	0.453
	100	0.1	0.185	0.228	0.322	0.465
	300	0.1	0.191	0.242	0.328	0.468

## Sheet: GROWTH CURVE 3
Growth curve - 27/06
	wt
		time
		0	90	180	270	360
	0	0.1	0.165	0.245	0.372	0.555
	10	0.1	0.179	0.257	0.387	0.594
	30	0.1	0.178	0.261	0.389	0.593
	100	0.1	0.214	0.298	0.446	0.675
	300	0.1	0.188	0.272	0.392	0.606
	ssp2 mutant
		time
		0	90	180	270	360
	0	0.1	0.14	0.196	0.277	0.396
	10	0.1	0.145	0.197	0.26	0.399
	30	0.1	0.155	0.209	0.299	0.421
	100	0.1	0.149	0.184	0.274	0.385
	300	0.1	0.156	0.214	0.3	0.423

## Sheet: ALL WT DATA
WILD-TYPE DATA
(GROWTH CURVE 1)
			Time						Results for Time = 0
			0	90	180	270	360			PCE	N	Mean	SE Mean	StDev
		0	0.1	0.112	0.15	0.225	0.326			0	3	0.1	0	0		SEM
		10	0.1	0.115	0.168	0.25	0.388			10	3	0.1	0	0			Time
		30	0.1	0.107	0.139	0.214	0.319			30	3	0.1	0	0			0	90	180	270	360
		100	0.1	0.114	0.156	0.232	0.344			100	3	0.1	0	0		0	0	0.0155	0.0275	0.0425	0.0663
		300	0.1	0.083	0.137	0.201	0.323			300	3	0.1	0	0		10	0	0.0187	0.0257	0.0398	0.0598
																30	0	0.0211	0.0356	0.0509	0.0795
(GROWTH CURVE 2)									Results for Time = 90							100	0	0.0289	0.041	0.0618	0.0958
			Time							PCE	N	Mean	SE Mean	StDev		300	0	0.0327	0.0402	0.0572	0.0827
			0	90	180	270	360			0	3	0.1407	0.0155	0.0268
		0	0.1	0.145	0.204	0.304	0.455			10	3	0.1497	0.0187	0.0323		AVERAGE
		10	0.1	0.155	0.21	0.306	0.472			30	3	0.1473	0.0211	0.0365			Time
		30	0.1	0.157	0.216	0.319	0.479			100	3	0.1637	0.0289	0.05			0	90	180	270	360
		100	0.1	0.163	0.226	0.339	0.487			300	3	0.1477	0.0327	0.0566		0	0.1	0.140667	0.199667	0.300333	0.445333
		300	0.1	0.172	0.234	0.342	0.504									10	0.1	0.149667	0.211667	0.314333	0.484667
									Results for Time = 180							30	0.1	0.147333	0.205333	0.307333	0.463667
(GROWTH CURVE 3)										PCE	N	Mean	SE Mean	StDev		100	0.1	0.163667	0.226667	0.339	0.502
			Time							0	3	0.1997	0.0275	0.0476		300	0.1	0.147667	0.214333	0.311667	0.477667
			0	90	180	270	360			10	3	0.2117	0.0257	0.0445
		0	0.1	0.165	0.245	0.372	0.555			30	3	0.2053	0.0356	0.0617
		10	0.1	0.179	0.257	0.387	0.594			100	3	0.2267	0.041	0.071
		30	0.1	0.178	0.261	0.389	0.593			300	3	0.2143	0.0402	0.0696
		100	0.1	0.214	0.298	0.446	0.675
		300	0.1	0.188	0.272	0.392	0.606
									Results for Time = 270
AVERAGE OF ALL 3			Time							PCE	N	Mean	SE Mean	StDev
			0	90	180	270	360			0	3	0.3003	0.0425	0.0736
		0	0.1	0.140667	0.199667	0.300333	0.445333			10	3	0.3143	0.0398	0.0689
		10	0.1	0.149667	0.211667	0.314333	0.484667			30	3	0.3073	0.0509	0.0881
		30	0.1	0.147333	0.205333	0.307333	0.463667			100	3	0.339	0.0618	0.107
		100	0.1	0.163667	0.226667	0.339	0.502			300	3	0.3117	0.0572	0.099
		300	0.1	0.147667	0.214333	0.311667	0.477667
FOLD CHANGE			Time						Results for Time = 360
			0	90	180	270	360			PCE	N	Mean	SE Mean	StDev
		0	1	1.40667	1.99667	3.00333	4.45333			0	3	0.4453	0.0663	0.1148
		10	1	1.49667	2.11667	3.14333	4.84667			10	3	0.4847	0.0598	0.1036
		30	1	1.47333	2.05333	3.07333	4.63667			30	3	0.4637	0.0795	0.1376
		100	1	1.63667	2.26667	3.39	5.02			100	3	0.502	0.0958	0.166
		300	1	1.47667	2.14333	3.11667	4.77667			300	3	0.4777	0.0827	0.1433
	STATISTICS
	ONE-WAY ANOVA
	RESPONSE: 0D600, FACTOR: PCE
	OD600 VERSUS PCE
	Method
	Null hypothesis	All means are equal
	Alternative hypothesis	Not all means are equal
	Significance level	α = 0.05
	Equal variances were assumed for the analysis.
	Analysis of Variance
	Source	DF	Adj SS	Adj MS	F-Value	P-Value
	PCE	4	0.00691	0.001727	0.07	0.99
	Error	70	1.64692	0.023527
	Total	74	1.65383
	Model Summary
	S	R-sq	R-sq(adj)	R-sq(pred)
	0.153387	0.0042	0	0
	Means
	PCE	N	Mean	StDev	95% CI
	0	15	0.2372	0.1398	(0.1582, 0.3162)
	10	15	0.2521	0.1504	(0.1731, 0.3311)
	30	15	0.2447	0.15	(0.1657, 0.3237)
	100	15	0.2663	0.1679	(0.1873, 0.3453)
	300	15	0.2503	0.1573	(0.1713, 0.3293)
	Pooled StDev = 0.153387

## Sheet: ALL MUTANT DATA
SSP2 MUTANT DATA
GROWTH CURVE 1									Results for Time = 0							SEM
			Time							PCE	N	Mean	SE Mean	StDev			Time
			0	90	180	270	360			0	3	0.1	0	0			0	90	180	270	360
		0	0.1	0.104	0.14	0.198	0.294			10	3	0.1	0	0		0	0	0.0202	0.0252	0.0337	0.047
		10	0.1	0.178	0.189	0.257	0.371			30	3	0.1	0	0		10	0	0.0105	0.0112	0.0185	0.0295
		30	0.1	0.152	0.182	0.276	0.392			100	3	0.1	0	0		30	0	0.00623	0.00994	0.0113	0.0176
		100	0.1	0.107	0.154	0.232	0.335			300	3	0.1	0	0		100	0	0.0225	0.0215	0.026	0.0379
		300	0.1	0.141	0.192	0.247	0.375									300	0	0.0148	0.0145	0.0238	0.0269
									Results for Time = 90
GROWTH CURVE 2										PCE	N	Mean	SE Mean	StDev		Average
			Time							0	3	0.1393	0.0202	0.035			Time
			0	90	180	270	360			10	3	0.166	0.0105	0.0182			0	90	180	270	360
		0	0.1	0.174	0.226	0.312	0.455			30	3	0.15967	0.00623	0.01079		0	0.1	0.139333	0.187333	0.262333	0.381667
		10	0.1	0.175	0.226	0.314	0.47			100	3	0.147	0.0225	0.039		10	0.1	0.166	0.204	0.277	0.413333
		30	0.1	0.172	0.214	0.315	0.453			300	3	0.1627	0.0148	0.0257		30	0.1	0.159667	0.201667	0.296667	0.422
		100	0.1	0.185	0.228	0.322	0.465									100	0.1	0.147	0.188667	0.276	0.395
		300	0.1	0.191	0.242	0.328	0.468		Results for Time = 180							300	0.1	0.162667	0.216	0.291667	0.422
										PCE	N	Mean	SE Mean	StDev
GROWTH CURVE 3										0	3	0.1873	0.0252	0.0437
			time							10	3	0.204	0.0112	0.0195
			0	90	180	270	360			30	3	0.20167	0.00994	0.01721
		0	0.1	0.14	0.196	0.277	0.396			100	3	0.1887	0.0215	0.0372
		10	0.1	0.145	0.197	0.26	0.399			300	3	0.216	0.0145	0.0251
		30	0.1	0.155	0.209	0.299	0.421
		100	0.1	0.149	0.184	0.274	0.385		Results for Time = 270
		300	0.1	0.156	0.214	0.3	0.423			PCE	N	Mean	SE Mean	StDev
										0	3	0.2623	0.0337	0.0584
AVERAGE OF ALL 3										10	3	0.277	0.0185	0.0321
			Time							30	3	0.2967	0.0113	0.0196
			0	90	180	270	360			100	3	0.276	0.026	0.045
		0	0.1	0.139333	0.187333	0.262333	0.381667			300	3	0.2917	0.0238	0.0411
		10	0.1	0.166	0.204	0.277	0.413333
		30	0.1	0.159667	0.201667	0.296667	0.422		Results for Time = 360
		100	0.1	0.147	0.188667	0.276	0.395			PCE	N	Mean	SE Mean	StDev
		300	0.1	0.162667	0.216	0.291667	0.422			0	3	0.3817	0.047	0.0815
										10	3	0.4133	0.0295	0.051
FOLD CHANGE										30	3	0.422	0.0176	0.0305
			Time							100	3	0.395	0.0379	0.0656
			0	90	180	270	360			300	3	0.422	0.0269	0.0465
		0	1	1.39333	1.87333	2.62333	3.81667
		10	1	1.66	2.04	2.77	4.13333
		30	1	1.59667	2.01667	2.96667	4.22
		100	1	1.47	1.88667	2.76	3.95
		300	1	1.62667	2.16	2.91667	4.22
	STATISTICS
	ONE-WAY ANOVA
	RESPONSE: 0D600, FACTOR: PCE
	OD600 VERSUS PCE
	Method
	Null hypothesis	All means are equal
	Alternative hypothesis	Not all means are equal
	Significance level	α = 0.05
	Equal variances were assumed for the analysis.
	Analysis of Variance
	Source	DF	Adj SS	Adj MS	F-Value	P-Value
	PCE	4	0.00639	0.001598	0.12	0.975
	Error	70	0.929396	0.013277
	Total	74	0.935786

## Sheet: wt and mutant
wt							mutant
SEM							SEM
	Time							Time
	0	90	180	270	360			0	90	180	270	360
0	0	0.0155	0.0275	0.0425	0.0663		0	0	0.0202	0.0252	0.0337	0.047
10	0	0.0187	0.0257	0.0398	0.0598		10	0	0.0105	0.0112	0.0185	0.0295
30	0	0.0211	0.0356	0.0509	0.0795		30	0	0.00623	0.00994	0.0113	0.0176
100	0	0.0289	0.041	0.0618	0.0958		100	0	0.0225	0.0215	0.026	0.0379
300	0	0.0327	0.0402	0.0572	0.0827		300	0	0.0148	0.0145	0.0238	0.0269
AVERAGE							Average
	Time							Time
	0	90	180	270	360			0	90	180	270	360
0	0.1	0.140667	0.199667	0.300333	0.445333		0	0.1	0.139333	0.187333	0.262333	0.381667
10	0.1	0.149667	0.211667	0.314333	0.484667		10	0.1	0.166	0.204	0.277	0.413333
30	0.1	0.147333	0.205333	0.307333	0.463667		30	0.1	0.159667	0.201667	0.296667	0.422
100	0.1	0.163667	0.226667	0.339	0.502		100	0.1	0.147	0.188667	0.276	0.395
300	0.1	0.147667	0.214333	0.311667	0.477667		300	0.1	0.162667	0.216	0.291667	0.422
SEM								AVERAGE
		Time								Time
		0	90	180	270	360				0	90	180	270	360
WT	0	0	0.0155	0.0275	0.0425	0.0663		WT	Control	0.1	0.140667	0.199667	0.300333	0.445333
ssp2D	0	0	0.0202	0.0252	0.0337	0.047		ssp2Δ	Control	0.1	0.139333	0.187333	0.262333	0.381667
WT	300	0	0.0327	0.0402	0.0572	0.0827		WT	PCE 300 µg/ml	0.1	0.147667	0.214333	0.311667	0.477667
ssp2D	300	0	0.0148	0.0145	0.0238	0.0269		ssp2Δ	PCE 300 µg/ml	0.1	0.162667	0.216	0.291667	0.422
