# Supplementary material for: Assessment of distinct effects of Parinari curatellifolia Planch.ex Benth Ethanolic leaf extract on glucose transport in different cell types
Source: PeerJ. 2025 Nov 10;13:e20269. doi: 10.7717/peerj.20269 (PMC12614100; doi:10.7717/peerj.20269)
Supplement: Supplemental Information 6 [file peerj-13-20269-s006.xlsx]

## Sheet: Adipocyte data
	deGlc uptake data from 3T3-L1 adipocytes
Basal	No PCE	50 μg/mL	100 μg/mL	200 ug/mL		Insulin	No PCE	50 μg/mL	100 μg/mL	200 ug/mL
n=1	53	45	52	57.8			344.3	285	203.5	191.2
n=2	45	40.5	43.6	42.1			365	310	225.5	206.2
n=3	47.3	45.6	44.9	41.8			375	291.5	217.5	186.8
	46.8		47.8				385.4		209
Each data point is mean of triplicate determinations at each condition (i.e. 3 technical reps of each data point)
MTT data in adipocytes
	0	10	50	100	[PCE] ug/mL
Expt 1	0.757	0.694	0.708	0.819
Expt 2	0.85	0.717	0.85	0.862
Expt 3	0.74	0.61	0.74	0.752
OilRed O quantification data
	Control	10	50	100
Expt 1	1	0.78	0.98	0.825
Expt 2	1	0.95	0.62
Expt 3	1	0.722	0.6875	0.59
Expt 4	1		0.88	0.94

## Sheet: CACO2 data
Transport data: raw data from typical experiment:
48h with PCE at indicated concentrations
Control	with CB		10	50	100	with CB
1728	2539		2723	4663	4296	2652
4336	2303		4054	4088	5274	2063
3131	2252		4409	3895	4035	2374
3911			3478	3515	3416
3276.5	2364.67		3666	4040.25	4255.25	2363
912			1032	1676	1862
									Shown below are results from two further experiments of this type, plus n=1 data (left)
									[PCE]	0	10	50	100
									n=1	1	1.13	1.54	1.62
									n=2	1	1.83	1.95	2.17
Normalised data n=1		0		912	1				n=3	1	2.05	2.56	2.66
		10		1032	1.13158
		50		1676	1.83772
		100		1862	2.04167
MTT data from 3 biological replicates
All normalised to no PCE addition; each is a mean of triplicate technical reps at each concentration of PCE
	0	10	50	100	[PCE]
#1	1	1.75	2.18	1.08
#2	1	1.25	2.16	1.84
#3	1	1.08	2.67	1.75
	GLUT quantification dataset
24h					48h
0	10	50	100		0	10	50	100
1	1.1	1.51	1.53		1	0.99	1.25	1.4
1	0.94	1.21	1.34		1	0.84	0.98	1.22
1	1.05	1.25	1.36		1	0.94	1.02	1.24

## Sheet: Supp Fig 1
Supp figure 1 - representative dataset
CONTROL CELLS							PCE TREATED CELLS
Basal	0.17 nM	1.7 nM	17 nM			Basal	0.17 nM	1.7 nM	17 nM
961	1305	3169	3944			688	1475	2999	3922
642	1140	2962	4138			903	982	2738	3862
Av						Av
801.5	1222.5	3065.5	4041			795.5	1228.5	2868.5	3892
CB:
186	162	235	468			174	168	317	497
Av-CB						Av-CB
615.5	1060.5	2830.5	3573			621.5	1060.5	2551.5	3395
Fold						Fold
1	1.72299	4.5987	5.80504			1	1.70636	4.10539	5.46259
		Basal	0.17 nM	1.7 nM	17 nM
	Control	1	1.72	4.59	5.8
	PCE	1	1.7	4.1	5.46
	Control	0.1	0.38	0.14	0.19
	PCE	0.16	0.22	0.45	0.24

## Sheet: Supp Fig 2
	H4IIE transport data
	Control	CB		10	CB	20	50
	3525	1372		2068	1279	2569	1714
	3374	1351		2644	950	1957	1467
	3537	1306		2709	1095	1699	1318
	3762	1398		3019	634	1526	1362
	3549.5	1356.75		2610	989.5	1937.75	1465.25
	2192.75			1620.5		948.25	475.75
	MTT data
	[PCE]	mean OD	SD
	0	0.26	0.014
	10	0.19	0.012
	50	0.14	0.04
	100	0.08	0.075

## Sheet: Sheet1
																					Figure 5C dataset
																					<>	1	2	3	4	5	6	7	8	9	10	11	12
																					A	0.1378	0.1584	0.1681	0.193	0.0323	0.1025	0.121	0.0922	0.1079	0.0302	0.0305	0.0332
																					B	0.1699	0.1725	0.2003	0.1911	0.0312	0.1027	0.1044	0.0866	0.1125	0.0321	0.034	0.0324
																					C	0.1532	0.1306	0.1828	0.1531	0.0317	0.0751	0.0868	0.1124	0.1003	0.0319	0.0348	0.0344
																					D	0.1878	0.127	0.2081	0.2285	0.0339	0.091	0.0914	0.1005	0.1162	0.0342	0.0338	0.0349
																					E	0.198	0.2106	0.183	0.19	0.0323	0.0916	0.0858	0.1127	0.0982	0.0327	0.0396	0.0335
																					F	0.0323	0.0324	0.0324	0.0323	0.0329	0.0327	0.0343	0.033	0.0327	0.0328	0.0333	0.0337
																					G	0.0331	0.0325	0.0323	0.0323	0.0332	0.033	0.0338	0.033	0.0324	0.0326	0.0333	0.0334
																					H	0.032	0.0321	0.0322	0.0336	0.0347	0.0335	0.0379	0.0328	0.0333	0.0326	0.0325	0.0325
																						Control- WT		Control - SSP2△		H₂O₂ - WT		H₂O₂ - SSP2△
																						0.1378	0.1584	0.1681	0.193	0.0323	0.1025	0.0922	0.1079
																						0.1699	0.1725	0.2003	0.1911	0.0312	0.1027	0.0866	0.1125
																						0.1532	0.1306	0.1828	0.1531	0.0317	0.0751	0.1124	0.1003
																						0.1878	0.127	0.2081	0.2285	0.0339	0.091	0.1005	0.1162
																						0.198	0.2106	0.183	0.19	0.0323	0.0916	0.1127	0.0982
																					PCE (ug/ml)	WT control	ssp2△ control	H₂O₂ treated WT	H₂O₂ treated ssp2△
																					0	0.1481	0.18055	0.0674	0.10005			0.009	0.042	0.012	0.02
																					10	0.1712	0.1957	0.06695	0.09955			0.012	0.054	0.009	0.01
																					30	0.1419	0.16795	0.0534	0.10635			0.03	0.002	0.01	0.012
																					100	0.1574	0.2183	0.06245	0.10835			0.03	0.05	0.002	0.01
																					300	0.2043	0.1865	0.06195	0.10545			0.01	0.009	0.012	0.05

## Sheet: Fly datasets
	Control	Sucrose diet	Metformin	16mg PCE/10g diet	50mg PCE/10g diet	100mg PCE/10g diet	200mg PCE/10g diet
	0.052568	0.064606	0.04387	0.04618	0.057188	0.040608	0.074312
	0.042103	0.081514	0.036803	0.049714	0.045229	0.044142	0.048083
	0.066894	0.067517	0.067924	0.049306	0.051888	0.037619	0.045229
	0.066294	0.110869	0.045909	0.044142	0.030416	0.048355	0.044685
	0.06874	0.085999	0.035172	0.063711	0.055422	0.038162	0.050937
